# Supplementary material
Source: Frontiers journal article supplement (https://www.frontiersin.org/articles/550734)
Supplement: Presentation_1.pdf [file Presentation_1.pdf]

## Supplementary material

Figure S1

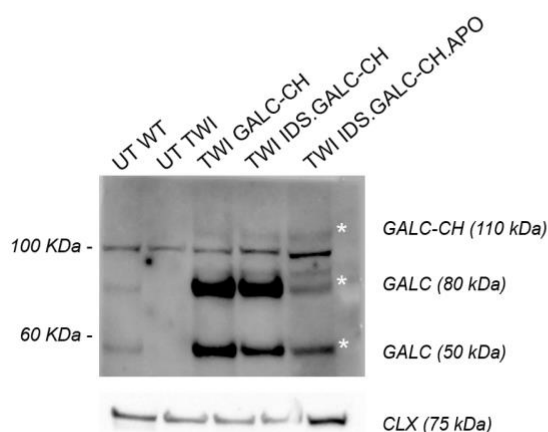

**Supplementary figure S1.** Representative WB showing GALC protein expression (anti-GALC antibody, CL1021APO, a gift of Dr. WC Lee; Lee, et al. 2007, Lattanzi et al., 2010) in UT WT NPCs, UT TWI NPCs and TWI NPCs transduced with the different LVs (all displaying VCN $\approx$ 7). The GALC antibody recognizes the GALC-CH protein (GALC precursor 80 KDa + mCherry 30KDa, present only in transduced TWI NPCs), the precursor GALC form (80 KDa), and the mature GALC form (50 KDa). Bands corresponding to the GALC forms are indicated by asterisks. A non-specific band is detected at 100 KDa. Calnexin (CLX) was used as normalizer.

**Legend to Supplementary Video S1 (related to Figure 1).** Confocal time-lapse images showing mCherry expression in WT NPCs transduced with LV.GALC-CH (100 MOI). NPCs were plated onto Matrigel-coated glass coverslips and cultured for 48 hours in proliferating conditions (growth medium). Coverslips were transferred in an Oko-Lab stage incubator, visualized at 63X magnification with a Leica TCS SP8 confocal microscope, and analysed with LasX software (see materials and methods). Cultures were recorded for 2 min (21 z-stack) in brightfield and direct mCherry fluorescence channel.

**Supplementary Table 1.** List of primary and secondary antibodies used for immunofluorescence (IF), Wester Blotting (WB), and ImageStream analysis (see materials and methods).

| Primary antibodies              | Code                              | Dilution |             |         |
|---------------------------------|-----------------------------------|----------|-------------|---------|
|                                 |                                   | IF       | ImageStream | WB      |
| Monoclonal mouse anti-Tuj1      | Biolegend, 801202                 | 1:500    | -           | -       |
| Monoclonal mouse anti-GalCer    | Millipore, MAB342                 | 1:300    | -           | -       |
| Hybridoma rat anti-Lamp1        | DSHB, 1D4B                        | 1:300    | 1:300       | -       |
| Polyclonal rabbit anti-LRP1     | Santa Cruz, sc16166               | 1:200    | -           | -       |
| Polyclonal rabbit anti-M6Pr     | Cell Signaling, 14364s            | 1:300    | -           | 1:300   |
| Polyclonal rabbit anti-mCherry  | Abcam, ab167453                   | 1:1,000  | 1:1,000     | -       |
| Polyclonal rabbit anti-LDLr     | Biovision, 3839-100               | -        | -           | 1:1,000 |
| Polyclonal rabbit anti-LRP2     | Santa Cruz, 25470                 | 1:200    | -           | 1:200   |
| Polyclonal rabbit anti-calnexin | Sigma, C4731                      | -        | -           | 1:3,000 |
| Monoclonal rabbit anti-mCherry  | Abcam, ab213511                   | -        | -           | 1:1,000 |
| Chicken anti-GALC               | CL1021APO                         |          |             | 1:1,000 |
| Secondary antibodies            | Code                              | Dilution |             |         |
|                                 |                                   | IF       | ImageStream | WB      |
| ALEXA 488 anti-mouse            | Thermo Fisher Scientific, A11001  | 1:1,000  | 1:1,000     | -       |
| ALEXA 546 anti-rabbit           | Thermo Fisher Scientific, A-11010 | 1:2,000  | -           | -       |
| ALEXA 594 anti-rabbit           | Thermo Fisher Scientific, A11012  | 1:2,000  | -           | -       |
| ALEXA 647 anti-rat              | Thermo Fisher Scientific, A21094  | 1:500    | 1:500       | -       |
| HRP anti mouse                  | Chemicon, AP124P                  | -        | -           | 1:5,000 |
| HRP anti rabbit                 | Chemicon, AP132P                  | -        | -           | 1:5,000 |

## References

Lattanzi A, Salvagno C, Maderna C, et al. Therapeutic benefit of lentiviral-mediated neonatal intracerebral gene therapy in a mouse model of globoid cell leukodystrophy. *Hum Mol Genet.* 2014;23(12):3250-3268. doi:10.1093/hmg/ddu034

Lee WC, Tsoi YK, Troendle FJ, et al. Single-dose intracerebroventricular administration of galactocerebrosidase improves survival in a mouse model of globoid cell leukodystrophy. *FASEB J.* 2007;21(10):2520-2527. doi:10.1096/fj.06-6169com
